# Supplementary material for: Development and Validation of a Risk Prediction Model for Mild Cognitive Impairment in Older Chinese Adults with Chronic Diseases
Source: Research Square preprint supplement (doi:10.21203/rs.3.rs-7042025/v1), 2025-07-23
Supplement: Supplementary file 1 [file 004e688fbce0ffa827fae96a.docx]

**Supplemental materials**

**Fig S1.** Participant Screening flowchart.


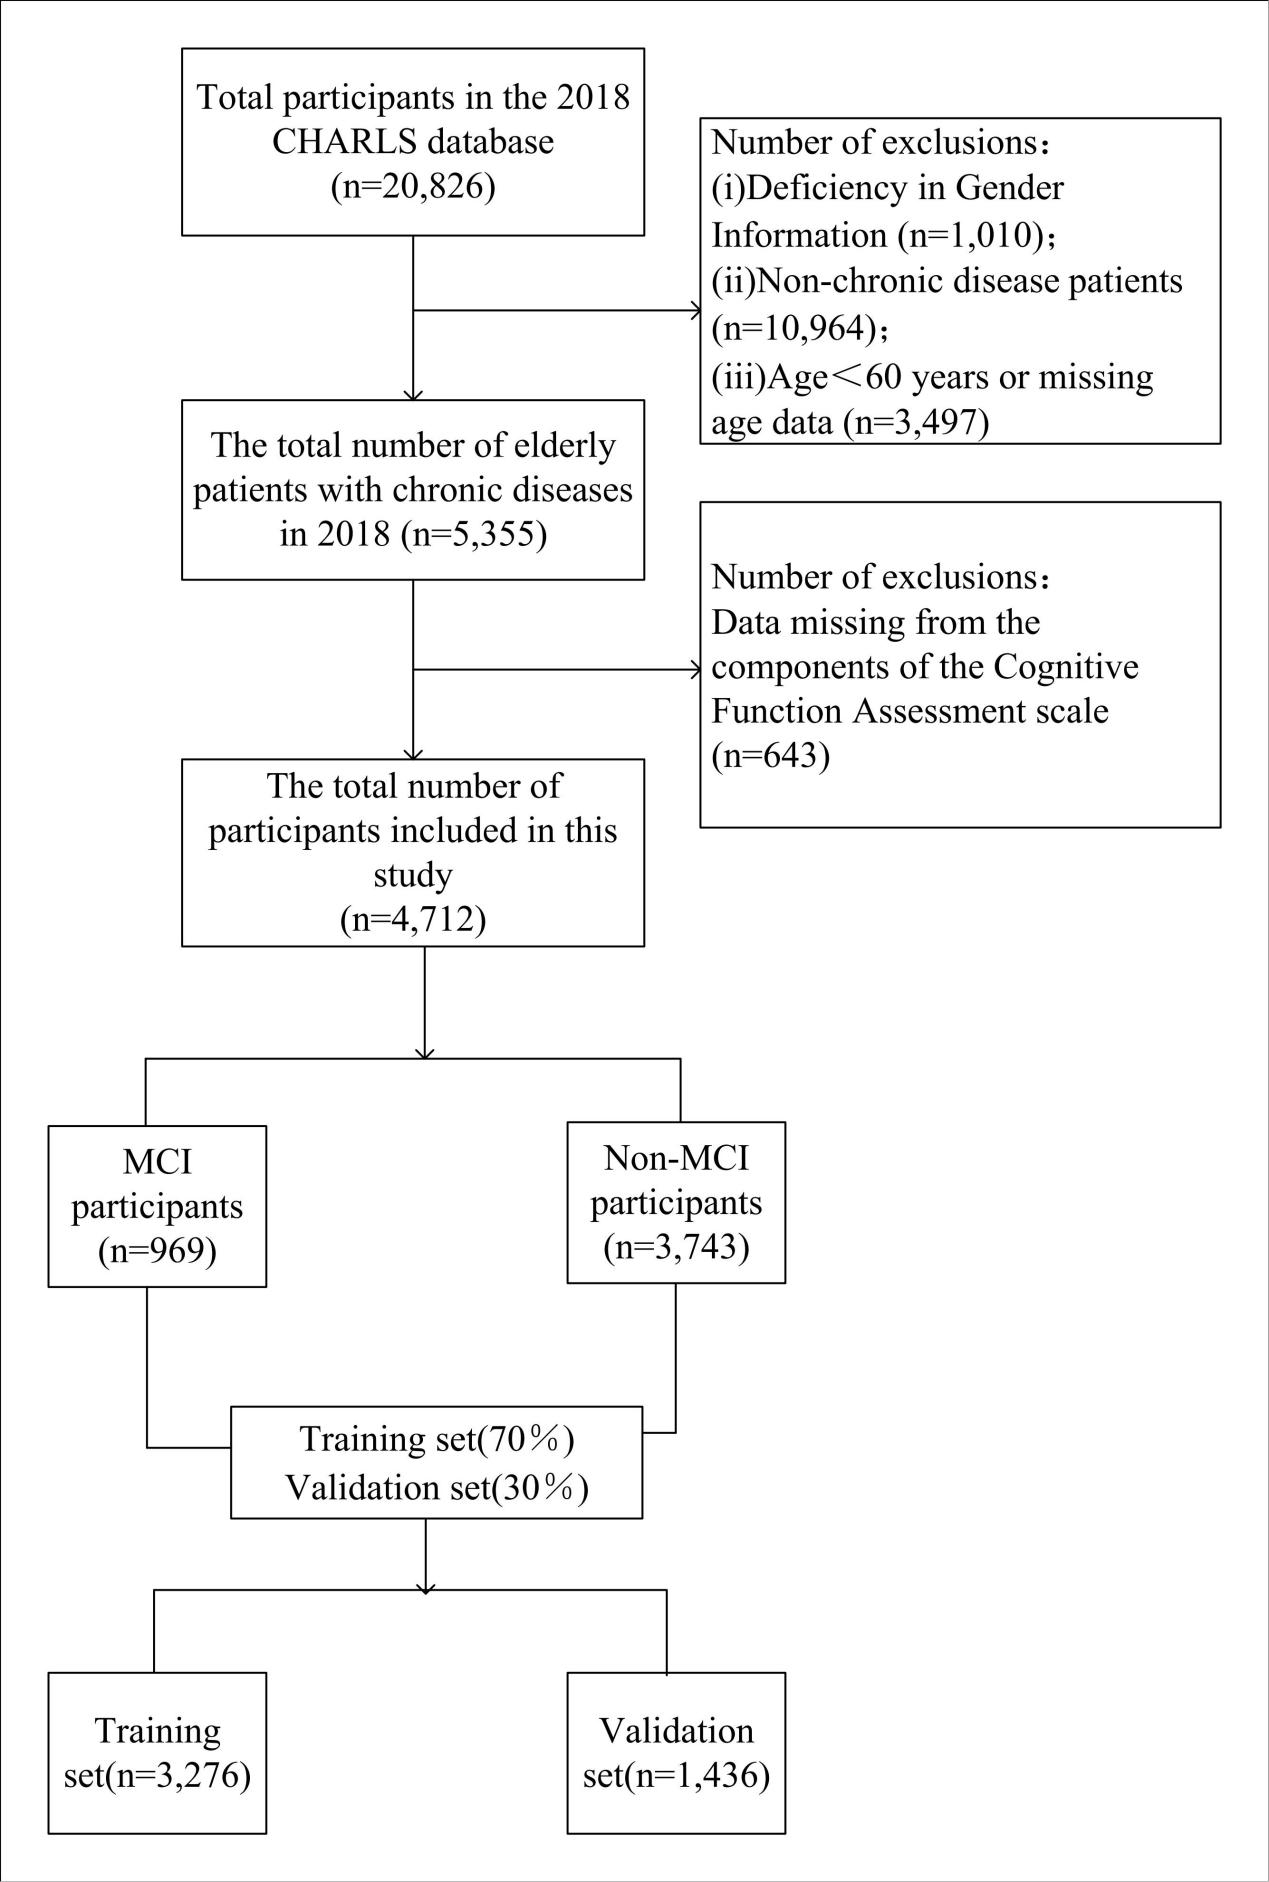


**Fig S2.** Age distribution and prevalence of MCI among older adults with chronic diseases

**
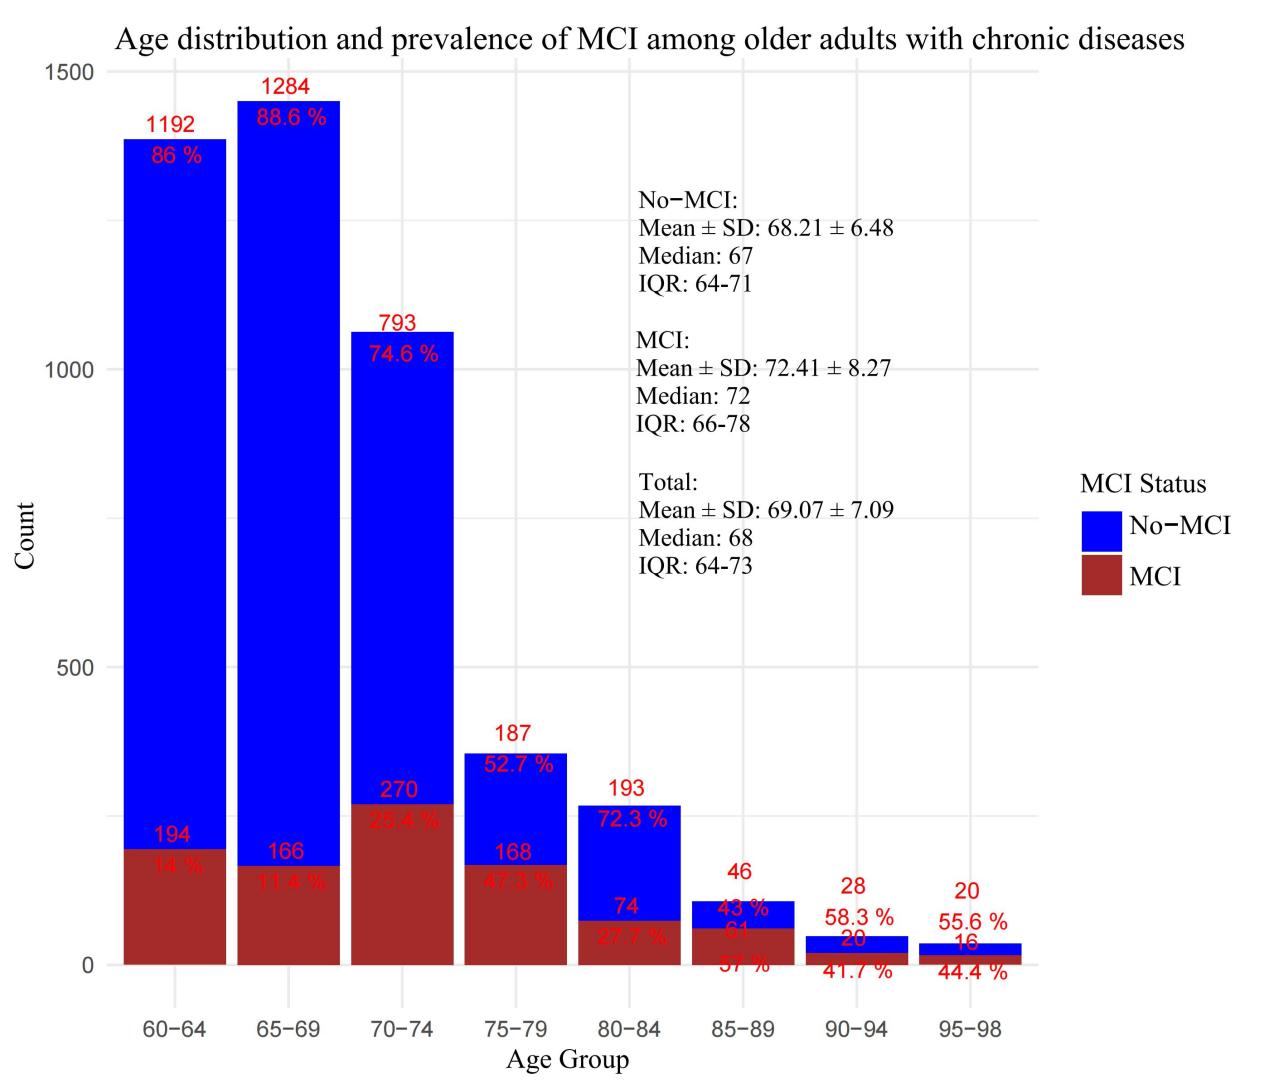
**

**Fig S3.** Distribution of each disease in the MCI group and the non-MCI group.


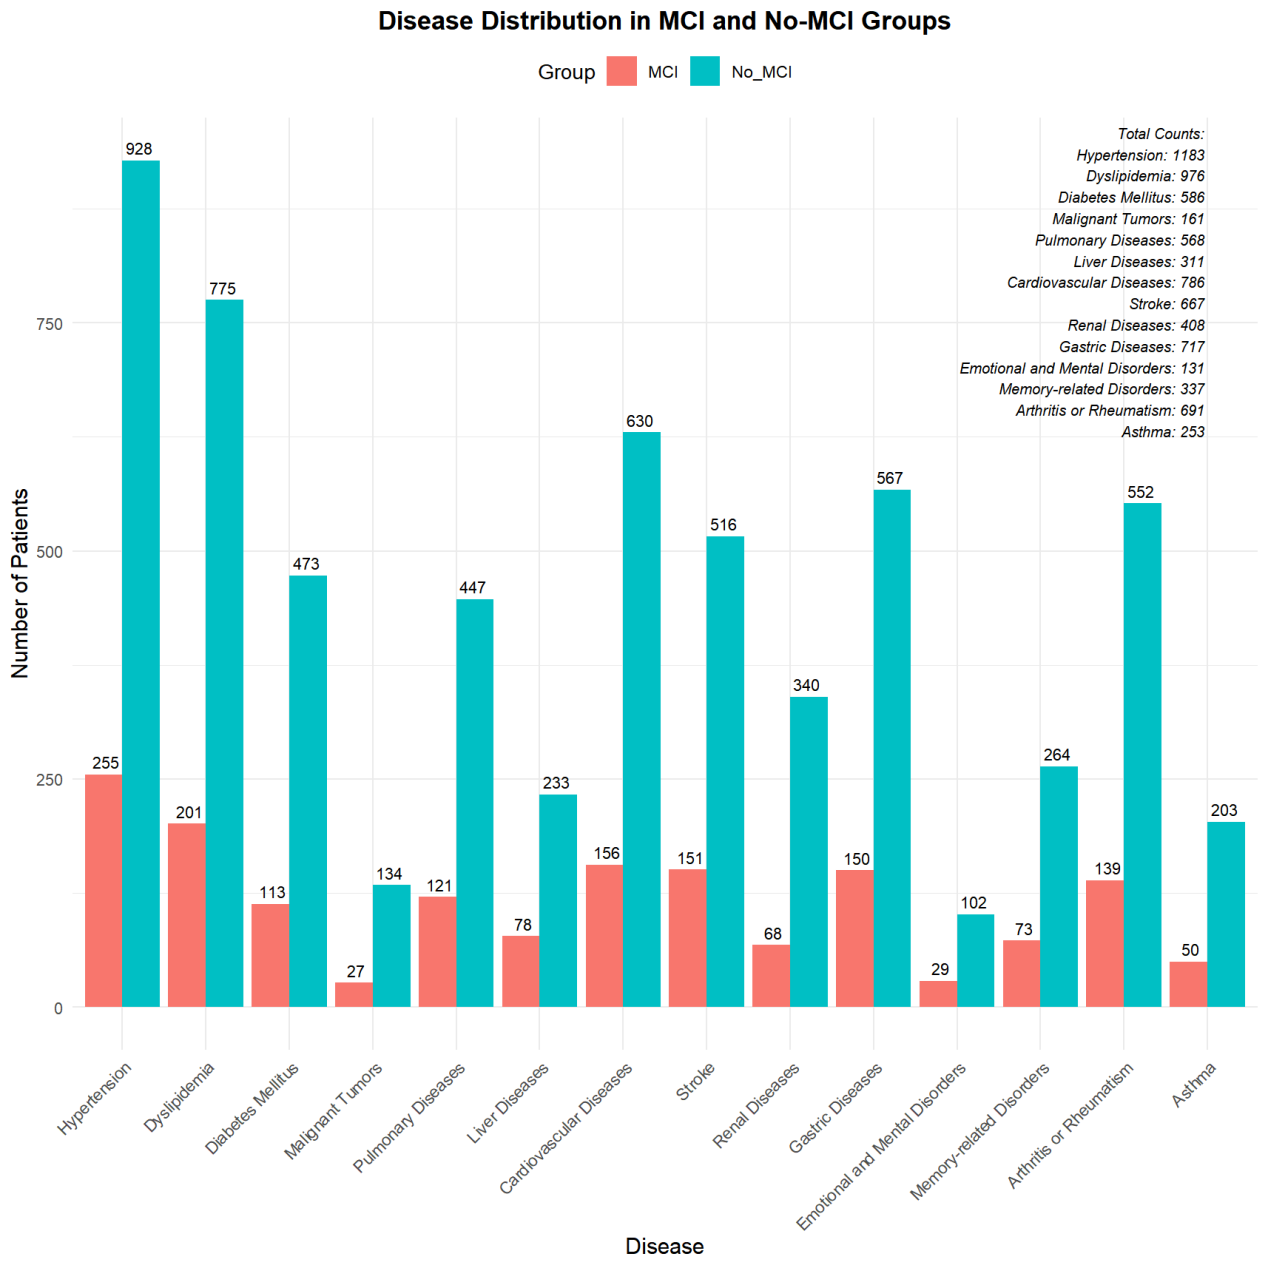


**Table S1.** Categorical variable assignment.

| Variable | Variable assignment |
| --- | --- |
| Sex | Male = 1; female = 0 |
| Physical exercise | Yes = 1; NO = 0 |
| Social activity | Yes = 1; NO = 0 |
| Marital satisfaction | Yes = 1; NO = 0 |
| Child satisfaction | Yes = 1; NO = 0 |
| Residence | Urban = 1; Rural = 0 |
| Air quality satisfaction | Yes = 1; NO = 0 |
| Whether he has been hospitalized in the past year(%) | Yes = 1; NO = 0 |
| Fall down(%) | Yes = 1; NO = 0 |
| Hip fracture | Yes = 1; NO = 0 |
| Life satisfaction | Yes = 1; NO = 0 |
| Health satisfaction | Yes = 1; NO = 0 |
| Medical insurance | Yes = 1; NO = 0 |
| Smoke | Yes = 1; NO = 0 |
| Drink | Yes = 1; NO = 0 |
| Physical disability | Yes = 1; NO = 0 |
| Depression | Yes = 1; NO = 0 |
| Distant object vision | Good = 1; Common = 2; Bad = 3 |
| Near object vision | Good = 1; Common = 2; Bad = 3 |
| Hearing | Good = 1; Common = 2; Bad = 3 |
| Be vexed by pain | No = 1; A little = 2; relatively much more = 3 |
| Education | Below junior high school = 1; High school or vocational school = 2; College or above = 3 |
| Memory | Good = 1; Common = 2; Bad = 3 |
| Naptime | ＞90min = 1; ≤90min = 2; 0min = 3 |
| Nighttime sleep | ＜6h = 1; ≥6h and ≤8h = 2; ＞8h = 3 |
| Income | Low income = 1; Middle income = 2; High income = 3 |
| Marriage | have a spouse = 1; have no spouse = 0 |
| Age | 60~69 = 1; 70~79 = 2; ≥80 = 3 |

| variable | VIF | Tolerance |
| --- | --- | --- |
| Sex | 1.898 | 0.527 |
| Physical exercise | 1.581 | 0.633 |
| Social activity | 1.058 | 0.946 |
| Marital satisfaction | 1.159 | 0.863 |
| Child satisfaction | 1.146 | 0.873 |
| Residence | 1.119 | 0.893 |
| Air quality satisfaction | 1.089 | 0.918 |
| Whether he has been hospitalized in the past year | 1.040 | 0.961 |
| Fall down | 1.075 | 0.930 |
| Hip fracture | 1.084 | 0.922 |
| Life satisfaction | 1.208 | 0.828 |
| Health satisfaction | 1.201 | 0.833 |
| Medical insurance | 1.028 | 0.973 |
| Smoke | 1.722 | 0.581 |
| Drink | 1.329 | 0.752 |
| Physical disability | 1.150 | 0.870 |
| Depression | 1.126 | 0.888 |
| Distant object vision | 1.437 | 0.696 |
| Near object vision | 1.377 | 0.726 |
| Hearing | 1.264 | 0.791 |
| Be vexed by pain | 1.217 | 0.821 |
| Education | 1.103 | 0.906 |
| Memory | 1.127 | 0.887 |
| Naptime | 1.540 | 0.650 |
| Night time sleep | 1.069 | 0.936 |
| Income | 1.098 | 0.911 |
| Marriage | 1.240 | 0.807 |
| Age | 1.180 | 0.847 |
| ADL score | 1.116 | 0.896 |
| Number of chronic diseases | 1.030 | 0.970 |

**Table S2.** Multicollinearity test for variables that are incorporated into the model.

VIF, variance inflation factors. Tolerance,1/VIF.
